# Supplementary material for: Light-promoted C–Cl bond-forming reductive elimination of a metal–metal bonded PdIII–PdIII complex
Source: Royal Society of Chemistry journal article supplement (doi:10.1039/d1cc03344a), 2021-01-01
Supplement: d1cc03344a1.pdf [file d1cc03344a1.pdf]

## Electronic Supplementary Information (ESI)

### Light-promoted C–Cl bond-forming reductive elimination of a metal-metal bonded Pd<sup>III</sup>–Pd<sup>III</sup> complex

Jeongcheol Shin, Kuldeep Gogoi, and Kiyoung Park\*

Department of Chemistry, Korea Advanced Institute of Science and Technology (KAIST),  
Daejeon 34141, Republic of Korea

\*Correspondence to: [kiyoung.park@kaist.ac.kr](mailto:kiyoung.park@kaist.ac.kr)

## Table of Contents

|                                                                                                                                   |    |
|-----------------------------------------------------------------------------------------------------------------------------------|----|
| Methods and Materials .....                                                                                                       | 3  |
| Thermal reductive elimination reactions .....                                                                                     | 5  |
| Photo-induced reductive elimination kinetics .....                                                                                | 6  |
| Raman spectra of Pd complexes .....                                                                                               | 13 |
| Quantum yield determination by ferrioxalate actinometry .....                                                                     | 15 |
| Validation of DFT models .....                                                                                                    | 16 |
| Fit parameters and TDDFT assignments for MCD/Abs spectra of <b>1</b> .....                                                        | 19 |
| Excited-state lifetimes of d <sup>7</sup> -d <sup>7</sup> binuclear complexes<br>and spin-orbit coupling (SOC) calculations ..... | 20 |
| Comparison of internal charge transfer energies .....                                                                             | 23 |
| DFT-calculated RE reactions of <b>1</b> at the ground and triplet excited-state .....                                             | 24 |
| <sup>1</sup> H-NMR spectra of Pd <sup>III</sup> -Pd <sup>III</sup> complexes .....                                                | 27 |
| Simulation for the dark reaction of <b>1</b> .....                                                                                | 28 |
| Correlations between the ICT energy costs<br>and C-C bond-forming RE barriers of Pt <sup>IV</sup> complexes .....                 | 29 |
| Cartesian coordinates of DFT-optimized Pd complexes .....                                                                         | 30 |
| References .....                                                                                                                  | 35 |

## Methods and Materials

**Material Synthesis.** Reagents were purchased from commercial suppliers (Alfa Aesar, Sigma-Aldrich, and Acros Organics), stored under N<sub>2</sub> conditions, and used as it is. All reactions were performed under anaerobic and dry conditions by using N<sub>2</sub>-filled glove boxes and Schlenk lines, as following previously reported synthetic protocols for PhICl<sub>2</sub> in ref<sup>1</sup>, [(phpy)Pd<sup>II</sup>(OAc)]<sub>2</sub> in ref<sup>2</sup>. [(phpy)Pd<sup>III</sup>(OAc)Cl]<sub>2</sub> (**1**) and 2-(2-chlorophenyl)pyridine (**2**) were synthesized with the same protocol as [(benzo[h]quinoline; bzh)Pd<sup>III</sup>(OAc)Cl]<sub>2</sub> but performed at a lower temperature of -35 °C.<sup>2</sup>

**Spectroscopic details.** *Nuclear Magnetic Resonance (NMR) spectroscopy.* The formation and purity of synthesized compounds were confirmed by <sup>1</sup>H-NMR spectra collected on a Bruker 400 MHz Avance III NMR spectrometer equipped with a BBFO probe. All NMR samples were anaerobically prepared in airtight J-Young NMR tubes using acetonitrile-d<sub>3</sub> solvent.

*Electronic absorption (Abs) and magnetic circular dichroism (MCD) spectroscopies.* A JASCO J-1500 CD spectrometer was used for both Abs and MCD spectra. The temperature of samples was controlled by using a Unisoku cryostat. The MCD spectra were collected in the solenoid core bore of a Cryomagnetics 5T cryogen-free superconducting magnet.

*Resonance Raman (rR) Spectroscopy.* The rR spectra collected with visible laser lines were measured on an Andor SR-750-A-R spectrometer equipped with 1200 and 1800 l/mm gratings, an Andor iVac DR-316B-LDCDD-RES detector, and Changchun New Industries optoelectronics 532, 515, and 488 nm lasers. Spectra obtained with NIR excitations were collected with an Andor SR-303i spectrometer equipped with a 1200 l/mm grating, an Andor iVac DR-324B-FI-RES detector, and an Innovative Photonic Solutions 785 and 633 nm laser. The powder sample of **1** was prepared in 4 mm EPR tubes and kept in a N<sub>2</sub>(l)-containing finger dewar during the data collection. The powder sample of [(phpy)Pd<sup>II</sup>(OAc)]<sub>2</sub> was prepared in capillary and measured at 298 K.

*Electron Paramagnetic Resonance (EPR) Spectroscopy.* The EPR spectra were collected with a Bruker EMXplus X-band EPR spectrometer equipped with an ER4141VT variable temperature controller and an ER4119HS cavity liquid nitrogen cryostat. Samples were frozen and stored under liquid nitrogen before measurement. EPR data were collected at 100 K.

**Photo-induced reactions.** [(phpy)Pd<sup>III</sup>(OAc)Cl]<sub>2</sub> (**1**) was dissolved in acetonitrile at -35 °C, and 330 μL of the solution was transferred to an airtight cuvette that was precooled to -35 °C in the N<sub>2</sub>-filled glove box. During the irradiation process, the sample was kept in the -35 °C Unisoku cryostat. Ten different (830, 785, 633, 532, 488, 442, 405, 355, 325, and 266 nm) laser lines were used. In addition to the above mentioned 785, 633, 532, and 488 nm lasers, Innovative Photonic Solutions 830 nm laser, Changchun New Industries optoelectronics 405, 355, and 266 nm lasers, Kimmon Koha Co., LTD. He-Cd IK 575II-G 325/442 nm dual laser were used with the 50 % ND filter to reduce the power of lasers to 50 mW. The power of laser was measured before and after the reaction to ensure the stability, by using a Thorlabs PM160T laser power meter with a thermal sensor within 5 % measurement errors. For LED experiment, a 45 W 427 nm Kessil PR160L LED was placed 5 cm away from the samples.

To measure the yield of the C–Cl coupled product after confirming the complete decay of **1** with the  $^1\text{H-NMR}$  spectroscopy, 3.6 equivalent of pyridine- $d_5$  was added to release the C–Cl coupled product from the Pd center, and after 2 hours, the final  $^1\text{H-NMR}$  spectra were measured, as following the procedure reported previously.<sup>2</sup>

**Protocol for ferrioxalate actinometry.** Potassium ferrioxalate was synthesized as reported,<sup>3</sup> and samples for the irradiation process were prepared in the same way as **1**. 330  $\mu\text{L}$  6 mM potassium ferrioxalate solution was prepared with the 50 mM  $\text{H}_2\text{SO}_4$  solution, and placed in a cuvette with 1 mm path length. After 50 mW 405 nm irradiation, 1 mL 0.1 % 1,10-phenanthroline (phen) aqueous solution and 125  $\mu\text{L}$  100 mM NaOAc/1 %  $\text{H}_2\text{SO}_4$  aqueous solution were added to the 250  $\mu\text{L}$  of the irradiated solution, and distilled water was filled to 2.5 mL. The final concentration was 0.6 mM, which is 10 times dilute relative to the solution irradiated. After waiting for 30 min, to quantify the  $[\text{Fe}(\text{phen})_3]^{2+}$  complex produced, the solution was placed in a 5 mm cuvette and the electronic absorption at 510 nm was measured. By using the extinction coefficient of 11,100  $\text{M}^{-1}\text{cm}^{-1}$  at 510 nm,<sup>4</sup> the photo-induced conversion ratios were calculated and compared to quantum yields reported in literature<sup>3</sup> to assess the effectiveness of our irradiation set-up.

**Computational details.** All the DFT calculations were conducted by the Gaussian 09-d.01<sup>5</sup> package, with B3LYP functional<sup>6</sup> in combination with 6-311g(d,p) basis set<sup>7</sup> for main group atoms and LANL2TZ(f) basis set<sup>8</sup> including effective core potential for Pd and Pt atoms obtained from the Basis Set Exchange software<sup>9</sup>. The CPCM solvation model was used with a dielectric constant of 36 for acetonitrile.<sup>10</sup> Mulliken population analysis and Mayer bond order calculations were performed with the QMForge 2.4 software.<sup>11</sup> The reaction coordinates were searched by calculating potential energy surfaces along the Pd–C and C–Cl bonds. Transition states were confirmed by one imaginary frequency and intrinsic reaction coordinate (IRC) calculations. Spin-orbit coupling constants of the Pd and Pt complexes were calculated by using the ORCA 4.2.0 software<sup>12</sup>, utilizing the ZORA-DEF2-TZVP basis set<sup>13</sup> for main-group atoms and SARC-ZORA-TZVP basis set<sup>14</sup> for Pd and Pt atoms, along with the B3LYP functional<sup>6</sup>.

## Thermal reductive elimination reactions

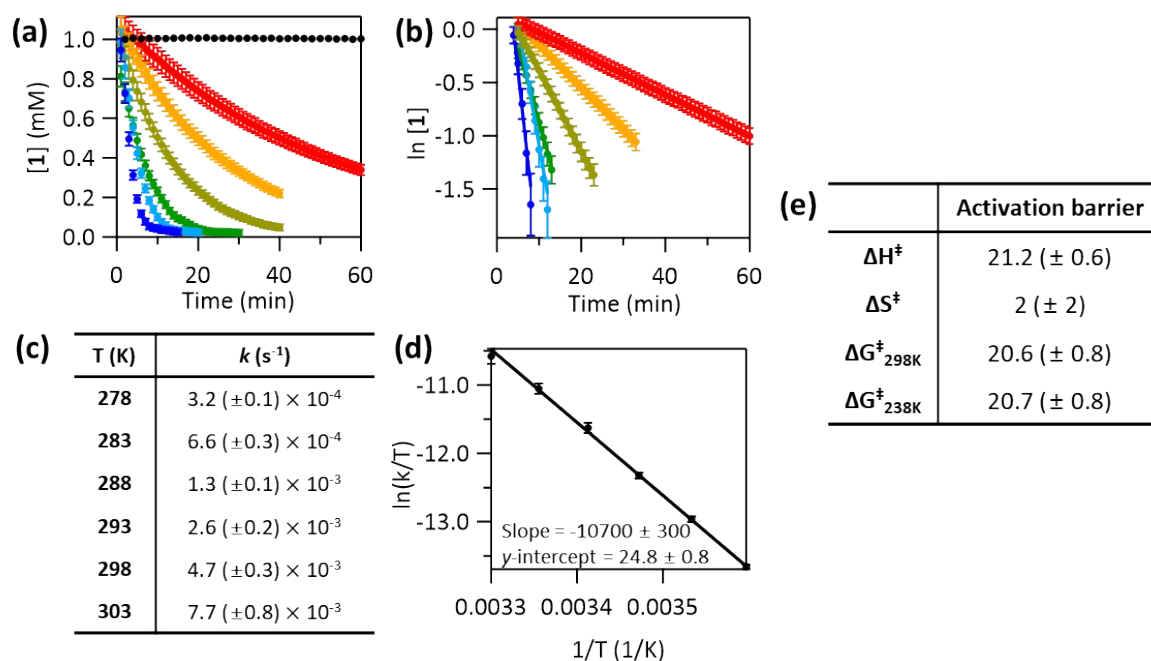

**Fig. S1** (a) Decay of **1** at  $-35$  °C (black),  $5$  °C (red),  $10$  °C (orange),  $15$  °C (yellow),  $20$  °C (green),  $25$  °C (light blue), and  $30$  °C (blue), monitored by electronic absorption at  $465$  nm. (b)  $\ln[1]$  as a function of reaction time. (c) Rate constants  $k$ 's obtained from (b). (d) Eyring plot with  $k$ 's in s<sup>-1</sup>. (e)  $\Delta H^\ddagger$  and  $\Delta G^\ddagger$  in kcal/mol and  $\Delta S^\ddagger$  in cal/mol K obtained from the Eyring plot. The  $k_{238K}$  of  $2.9 \times 10^{-5} \text{ min}^{-1}$  was obtained from extrapolation.

## Photo-induced reductive elimination kinetics

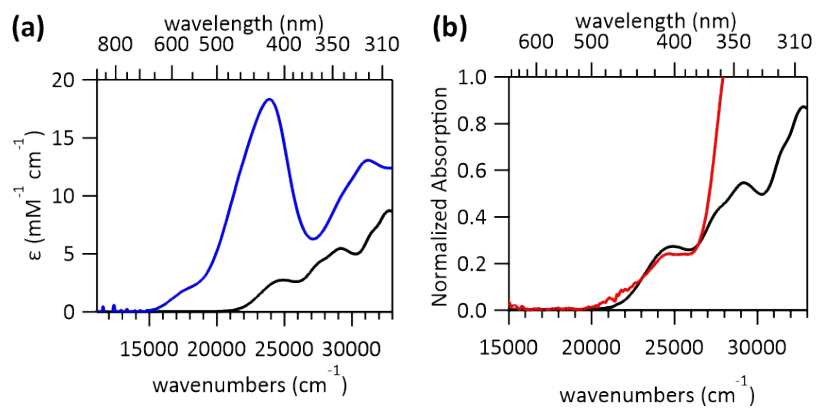

**Fig. S2** (a) Abs spectra of **1** (blue) and  $[(\text{phpy})\text{Pd}^{\text{II}}(\text{OAc})_2]$  (black). (b) Abs spectra of  $[(\text{phpy})\text{Pd}^{\text{II}}(\text{OAc})_2]$  (black) and the final solution obtained after 442 nm laser irradiation onto **1** (red).

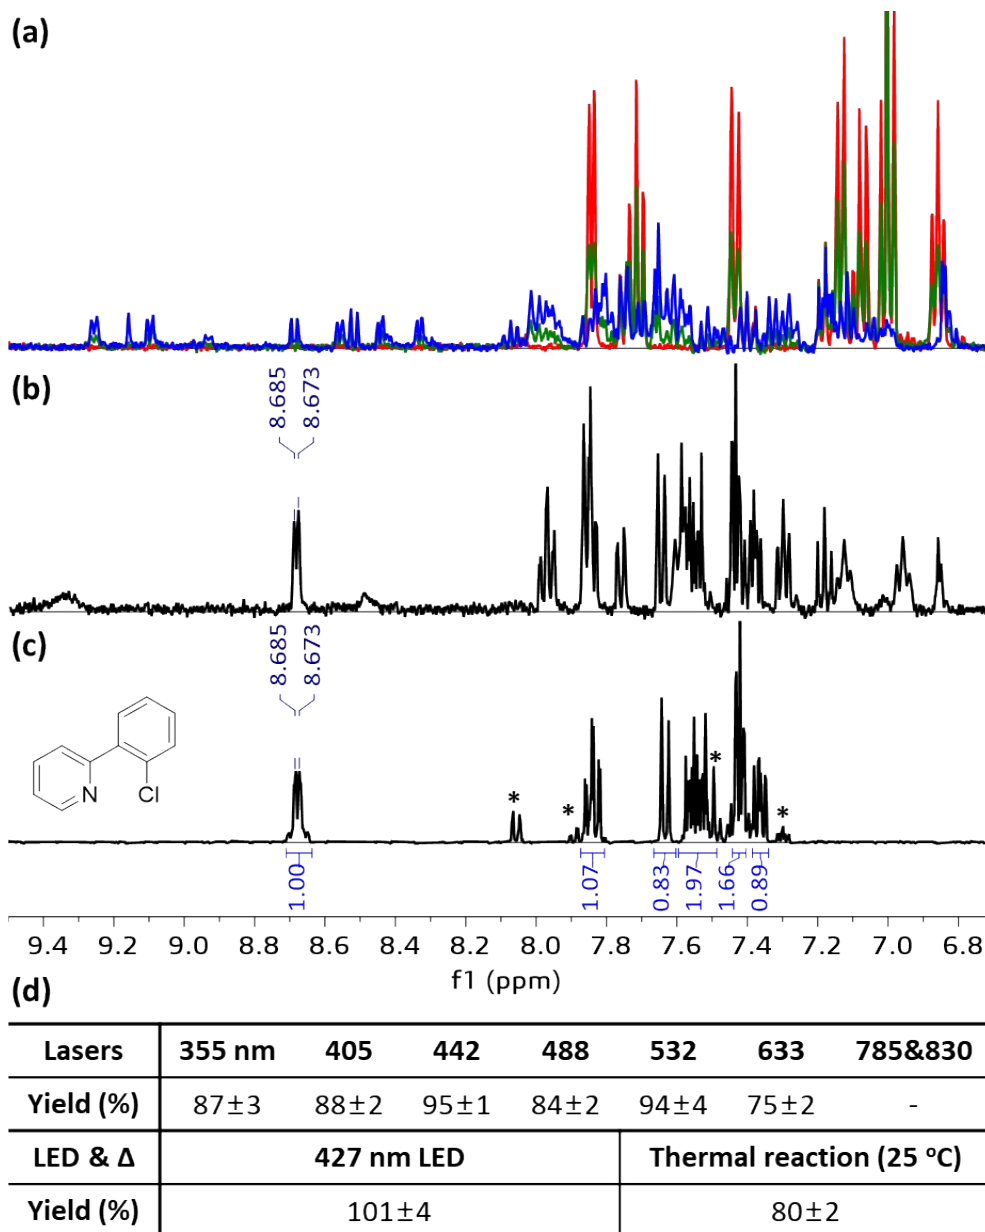

**Fig. S3**  $^1\text{H}$  NMR-monitored photochemical transformation of **1** with 442 nm laser irradiation. (a) Spectra obtained after 0 (red), 15 (green), and 60 min (blue) irradiation. (b) Final spectrum obtained 2 hours after addition of pyridine- $\text{d}_5$  to the irradiated solution. (c) Separately synthesized 2-(2-chlorophenyl)pyridine (**2**). Peaks labeled with asterisks are irrelevant side products from synthesis. (d) Yields of **2** from a thermal reaction at room temperature and photochemical reactions at  $-35\text{ °C}$  of **1**.

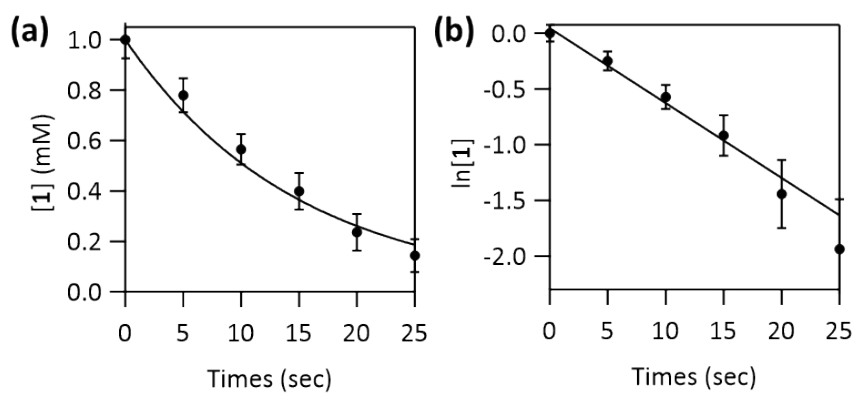

**Fig. S4** (a) 45 W 427 nm LED induced decay of **1**. (b) The natural logarithm plot as a function of irradiation time at  $-35$  °C, showing the 1<sup>st</sup> order kinetics. The fit curve is obtained with  $k = 4.0 (\pm 0.5) \text{ min}^{-1}$ .



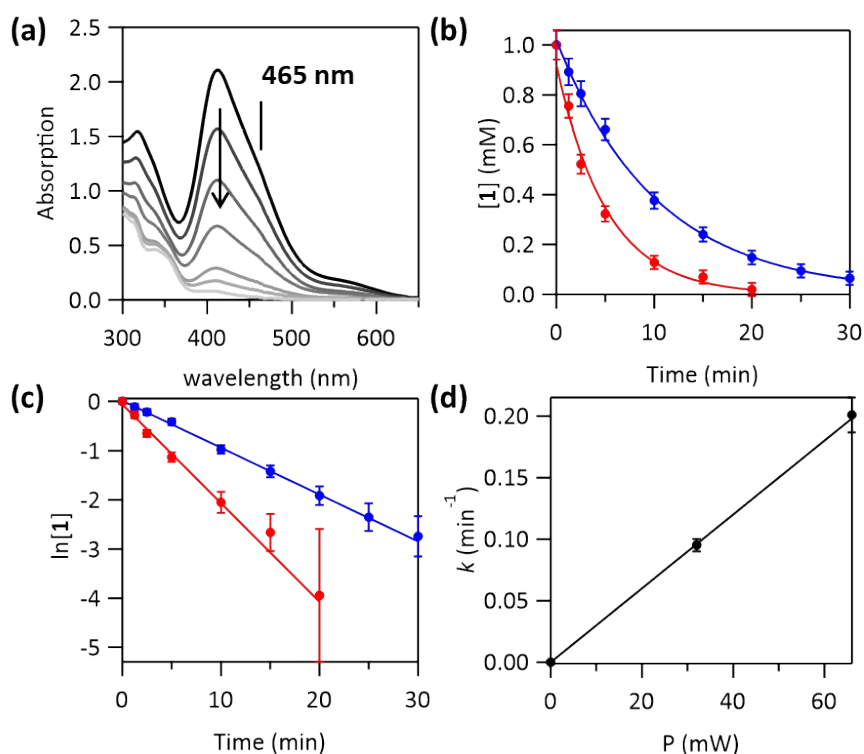

**Fig. S5** Light power dependence of the photo-decay of **1**. (a) Abs spectra of **1** obtained 0, 1.25, 2.5, 5, 10, 15, and 20 minutes after 66 mW 442 nm laser irradiation. (b)  $[1]$  and (c)  $\ln[1]$  versus irradiation time obtained. Decay of **1** with a power of 32 mW (blue) and 66 mW (red). (d) 1<sup>st</sup> order rate constants ( $k$ 's) versus laser power. This linear relationship was used for converting rate constants obtained with different laser powers to those of a normalized laser power of 50 mW.

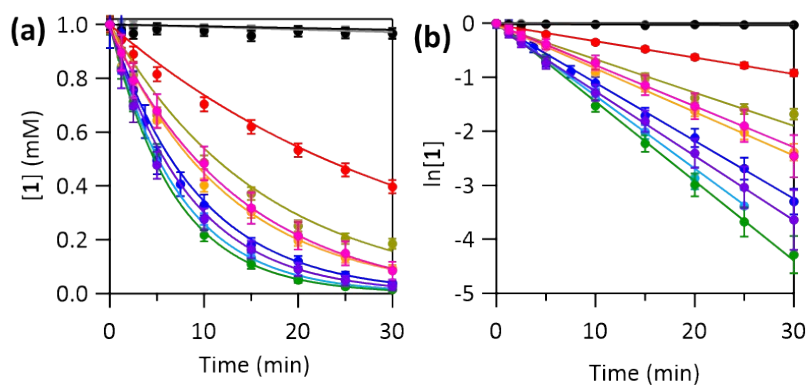

**Fig. S6** (a) Decay of **1** as a function of irradiation time of the 50 mW 830 (black), 785 (gray) 633 (red), 532 (orange), 488 (yellow), 442 (green), 405 (light blue), 355 (blue), 325 (purple), and 266 (pink) nm lasers. (b) Plots of  $\ln[1]$  vs. irradiation time to show the 1<sup>st</sup>-order kinetics of the RE reaction. Rate constants obtained from (b) were used to construct the fitting curves in (a).

**Table S1** 1<sup>st</sup>-order rate constants ( $k$ , in min<sup>-1</sup>) and quantum yields ( $\Phi$ ) for the photo-induced decay of **1** with 50 mW laser lines. Errors in  $k$  values obtained by linear regression analysis are represented.

|                          |                                |                                |                                |                                |                                |
|--------------------------|--------------------------------|--------------------------------|--------------------------------|--------------------------------|--------------------------------|
|                          | <b>830 nm</b>                  | <b>785 nm</b>                  | <b>633 nm</b>                  | <b>532 nm</b>                  | <b>488 nm</b>                  |
| <b><math>k</math></b>    | $7 (\pm 7) \times 10^{-4}$     | $1.0 (\pm 0.6) \times 10^{-3}$ | $3.0 (\pm 0.2) \times 10^{-2}$ | $8.1 (\pm 0.3) \times 10^{-2}$ | $6.0 (\pm 0.2) \times 10^{-2}$ |
| <b><math>\Phi</math></b> | 0                              | 0.044                          | 0.18                           | 0.12                           | 0.05                           |
|                          | <b>442 nm</b>                  | <b>405 nm</b>                  | <b>355 nm</b>                  | <b>325 nm</b>                  | <b>266 nm</b>                  |
| <b><math>k</math></b>    | $1.6 (\pm 0.1) \times 10^{-1}$ | $1.3 (\pm 0.1) \times 10^{-1}$ | $1.1 (\pm 0.1) \times 10^{-1}$ | $1.2 (\pm 0.1) \times 10^{-1}$ | $7.6 (\pm 0.7) \times 10^{-2}$ |
| <b><math>\Phi</math></b> | 0.12                           | 0.12                           | 0.13                           | 0.14                           | 0.10                           |

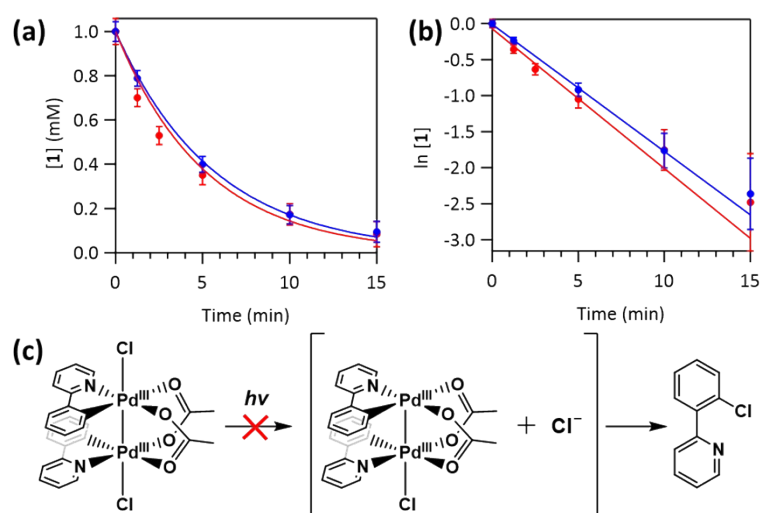

**Fig. S7** Effect of exogenous  $\text{Cl}^-$  on the RE rate. (a) Decay of **1** as a function of irradiation time of the 50 mW 442 nm laser in the presence (blue) and absence (red) of 3 equivalents tetra-n-butylammonium chloride (TBACl). (b) Plots of  $\ln[1]$  vs. irradiation time to show the 1<sup>st</sup>-order kinetics of the RE reaction. (c) Scheme for the RE reaction of **1** driven by photo-induced  $\text{Cl}^-$  dissociation which can be excluded by this experiment. Rate constants  $(1.8 (\pm 0.1) \times 10^{-1} \text{ min}^{-1}$  for blue and  $1.9 (\pm 0.2) \times 10^{-1} \text{ min}^{-1}$  for red) obtained from (b) were used to construct the fitting curves in (a).

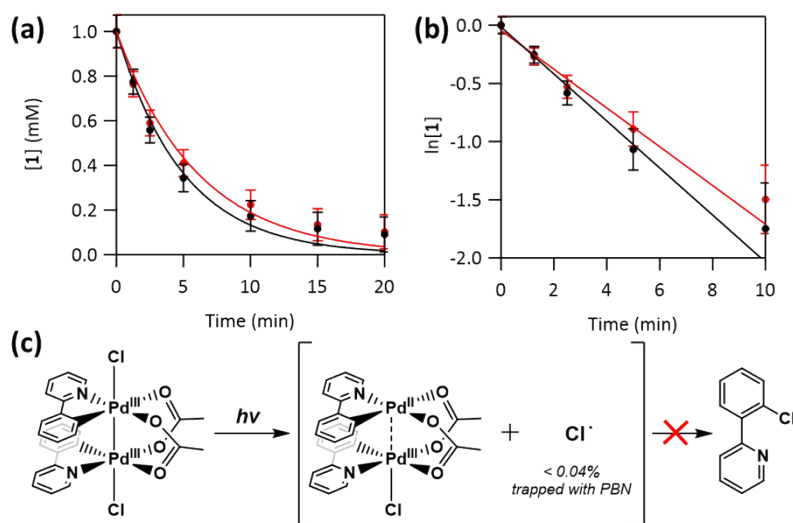

**Fig. S8** Effect of exogenous  $\alpha$ -phenyl-N-tert-butyl nitron (PBN) on the RE rate. (a) Decay of **1** as a function of irradiation time of the 50 mW 442 nm laser in the presence (black) and absence (red) of 50 equivalents PBN. (b) Plots of  $\ln[1]$  vs. irradiation time to show the 1<sup>st</sup>-order kinetics of the RE reaction. (c) Scheme for the RE reaction of **1** driven by photo-induced  $\text{Cl}^-$  radical dissociation which can be excluded by this experiment. Rate constants  $(2.0 (\pm 0.3) \times 10^{-1} \text{ min}^{-1}$  for black and  $1.7 (\pm 0.2) \times 10^{-1} \text{ min}^{-1}$  for red) obtained from (b) were used to construct the fitting curves in (a).

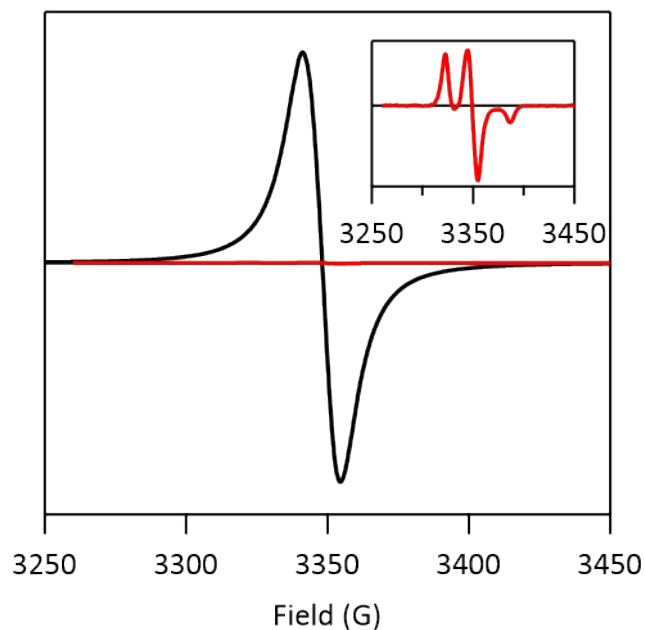

**Fig. S9** 100 K X-band EPR spectra of final solution after completing the photochemical RE reaction of **1** + 50 equivalents PBN with 427 nm LED at  $-35\text{ }^{\circ}\text{C}$  (red). (2,2,6,6-tetramethylpiperidin-1-yl)oxyl (TEMPO) radical used as a spin quantification external standard (black). The inset describes a magnified spectrum. Based on the initial concentration of complex **1**, 0.04 % of PBN adduct was detected after finishing the RE reaction.

## Raman spectra of Pd complexes

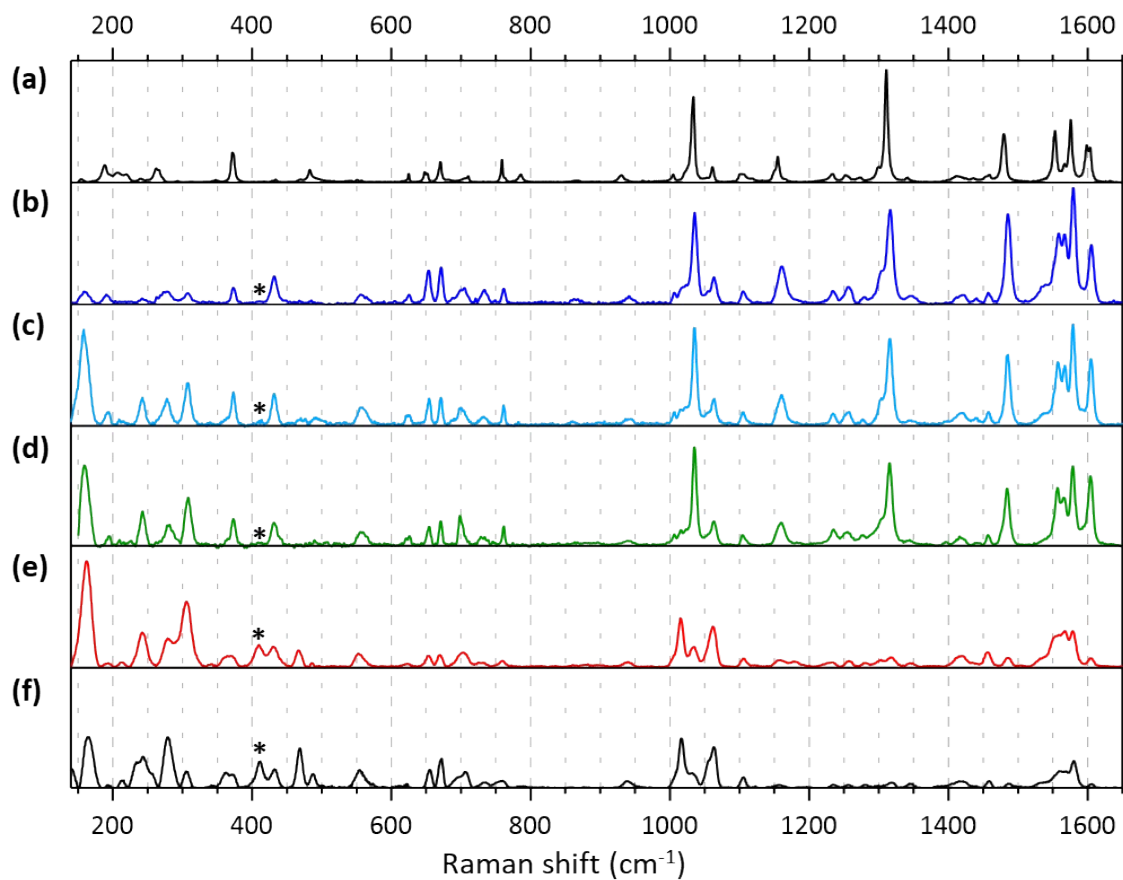

**Fig. S10** (a) 298 K off-resonance Raman spectrum of  $[(\text{phpy})\text{Pd}^{\text{II}}(\text{OAc})_2]$  measured with 532 nm laser excitation. (b)-(f) 77 K resonance Raman spectra of **1** measured with (b) 488, (c) 515, (d) 532, (e) 633, and (f) 785 nm laser excitations. Spectra in (e) and (f) were 10 times magnified for clarity. Asterisk-labeled peaks at  $411 \text{ cm}^{-1}$  were used for intensity normalization

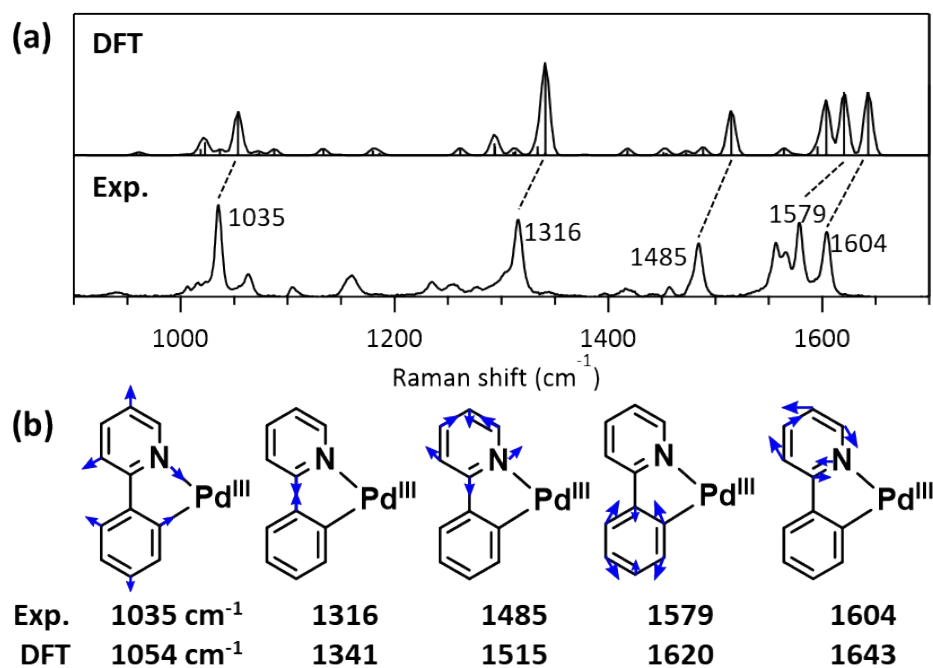

**Fig. S11** (a) DFT-calculated and experimental Raman spectra of **1** obtained with 532 nm excitation. (b) DFT-calculated frequencies and normal modes that contain the C–C/C=C and C–N/C=N stretching vibrations of the phpy ligand. Negligible motions of other atoms are omitted for clarity.

## Quantum yield determination by ferrioxalate actinometry

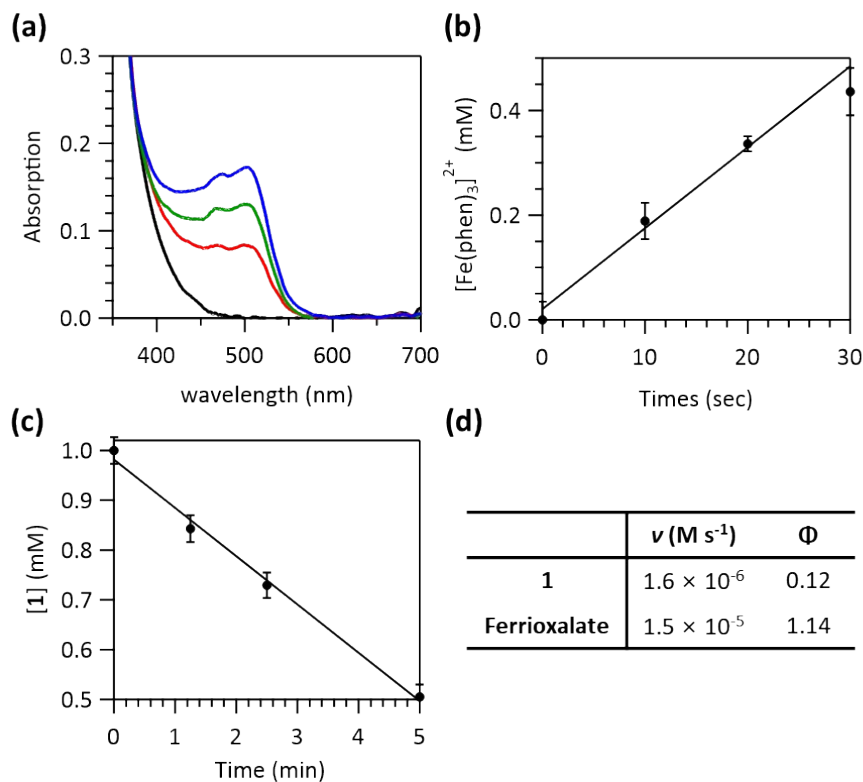

**Fig. S12** Abs spectra obtained after adding 1,10-phenanthroline (phen) into the ferrioxalate solution that had been exposed to the 405 nm laser line for 0 (black), 10 (red), 20 (green), and 30 (blue) seconds. (b) Yield of [Fe(phen)<sub>3</sub>]<sup>2+</sup> as a function of irradiation time. (c) Decay of **1** as a function of irradiation time. (d) Rates ( $\nu$ 's) and quantum yields ( $\Phi$ 's) of photoreactions obtained by using the literature reported  $\Phi_{\text{ferrioxalate}}$ , and the equation of  $\Phi_1 = \nu_1/\nu_{\text{ferrioxalate}} \times \Phi_{\text{ferrioxalate}}$ .

## Validation of DFT models

**Table S2** Metal-ligand bond distances of **1** in the X-ray crystal structure<sup>2</sup> and the DFT-optimized structures obtained with the BP86,<sup>6a, 15</sup> B3LYP,<sup>6</sup> and Cam-B3LYP<sup>16</sup> functionals.

|                            | Crystal | BP86 | B3LYP | Cam-B3LYP |
|----------------------------|---------|------|-------|-----------|
| Pd–Pd                      | 2.57    | 2.68 | 2.71  | 2.60      |
| Pd–Cl                      | 2.42    | 2.51 | 2.52  | 2.47      |
| Pd–O <sub>trans-to-N</sub> | 2.04    | 2.07 | 2.06  | 2.04      |
| Pd–O <sub>trans-to-C</sub> | 2.13    | 2.21 | 2.22  | 2.17      |
| Pd–C                       | 2.00    | 2.00 | 2.00  | 1.99      |
| Pd–N                       | 2.02    | 2.04 | 2.04  | 2.02      |

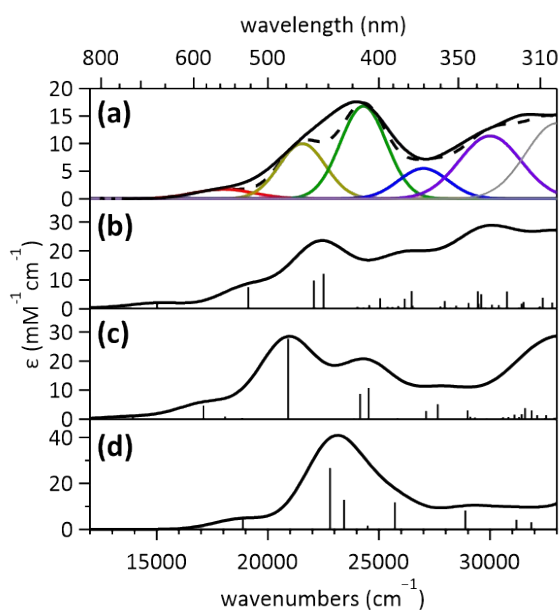

**Fig. S13** (a) Experimental Abs spectrum of **1**, and TDDFT-simulated Abs spectra obtained with the (b) BP86, (c) B3LYP, and (d) Cam-B3LYP functionals. The B3LYP calculation was used for detailed analysis.



**Table S3** Effects of a variation in the Pd–Cl bond length on metal-ligand bond distances and Gibbs free energy. Since DFT calculations tend to overestimate the Pd–Cl bond lengths, structures with the Pd–Cl bond lengths constrained were tested, showing that the constraints barely affect other bonds and energy.

|                            | Full optimization | Pd–Cl Constrained optimization |                |
|----------------------------|-------------------|--------------------------------|----------------|
|                            |                   | 2.46 Å                         | 2.42 Å         |
| Pd–Pd                      | 2.71              | 2.71                           | 2.72           |
| Pd–Cl                      | 2.52              | 2.46                           | 2.42           |
| Pd–O <sub>trans-to-N</sub> | 2.06              | 2.07                           | 2.07           |
| Pd–O <sub>trans-to-C</sub> | 2.22              | 2.22                           | 2.22           |
| Pd–C                       | 2.00              | 2.00                           | 2.00           |
| Pd–N                       | 2.04              | 2.04                           | 2.05           |
| $\Delta G_{243K}$          | 0.00 kcal/mol     | +0.65 kcal/mol                 | +1.65 kcal/mol |

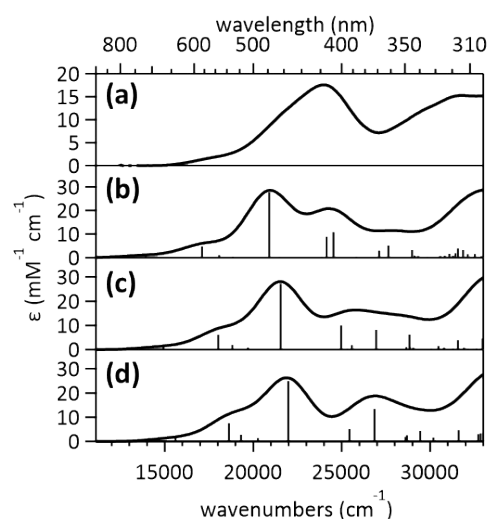

**Fig. S14** (a) Experimental Abs spectrum of **1**, and TDDFT-simulated Abs spectra of **1** with (b) the fully-optimized Pd–Cl bond lengths of 2.52 Å and the constrained Pd–Cl bond lengths of (c) 2.46 Å and (d) 2.42 Å. The last spectrum from the most crystal-like structure best reproduces the experiment and thus was used for detailed analysis.

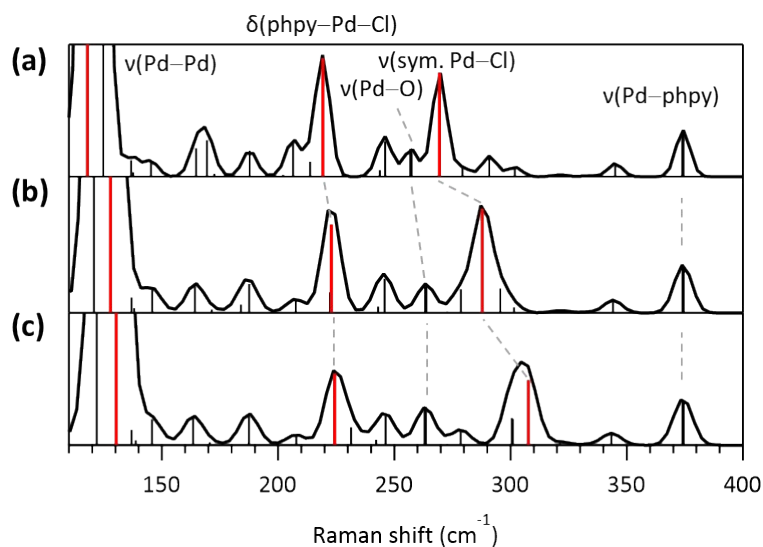

**Fig. S15** Effects of a variation in the Pd–Cl bond length on DFT-calculated normal modes. DFT-simulated Raman spectra of **1** with the Pd–Cl bond lengths of (a) 2.52 Å, (b) 2.46 Å, and (c) 2.42 Å, showing that the energies of the Pd–Pd and Pd–Cl stretching vibrations can be significantly underestimated with the overestimated Pd–Cl bond lengths. The last spectrum obtained from the most crystal-like structure was used for detailed analysis.

## Fit parameters and TDDFT assignments for the MCD/Abs spectra of 1

**Table S4** Gaussian deconvolution fit parameters for the MCD and Abs spectra of 1, and related TDDFT-calculated transitions.

| Band | Abs                            |                                                 | MCD                            |                                                       | $10^5 \times \text{MCD/Abs}$<br>ratio | TDDFT<br>assignment                                                                                        |                                                                  |
|------|--------------------------------|-------------------------------------------------|--------------------------------|-------------------------------------------------------|---------------------------------------|------------------------------------------------------------------------------------------------------------|------------------------------------------------------------------|
|      | Energy<br>( $\text{cm}^{-1}$ ) | $\epsilon$<br>( $\text{M}^{-1}\text{cm}^{-1}$ ) | Energy<br>( $\text{cm}^{-1}$ ) | $\Delta\epsilon$<br>( $\text{M}^{-1}\text{cm}^{-1}$ ) |                                       |                                                                                                            |                                                                  |
| 1    | 18,000                         | 1,700                                           | 17,700                         | -0.14                                                 | -8.2                                  | <b>#3</b><br>147 $\rightarrow$ 148 (34 %)<br>146 $\rightarrow$ 148 (56 %)                                  | $\text{Pd}_2 \text{d}\sigma \rightarrow \text{d}\sigma^*$        |
| 2    | 21,550                         | 10,000                                          | 21,200                         | -0.23                                                 | -2.3                                  | <b>#10</b><br>146 $\rightarrow$ 148 (37 %)<br>143 $\rightarrow$ 148 (32 %)<br>147 $\rightarrow$ 148 (21 %) | $\text{Phpy } \pi \rightarrow \text{Pd}_2 \text{d}\sigma^*$      |
| 3    | 24,300                         | 16,800                                          | 24,600                         | -0.34                                                 | -2.0                                  | <b>#19</b><br>143 $\rightarrow$ 148 (53 %)<br>147 $\rightarrow$ 148 (25 %)                                 | $\text{Phpy } \pi \rightarrow \text{Pd}_2 \text{d}\sigma^*$      |
| 4    | 27,000                         | 5,500                                           | 27,200                         | +0.35                                                 | +6.4                                  | <b>#30</b><br>137 $\rightarrow$ 148 (74 %)<br>147 $\rightarrow$ 151 (17 %)                                 | $\text{OAc } 2\text{p} \rightarrow \text{Pd}_2 \text{d}\sigma^*$ |
| 5    | 30,000                         | 11,400                                          | 30,400                         | +1.22                                                 | +11                                   | <b>#35</b><br>147 $\rightarrow$ 151 (53 %)<br>137 $\rightarrow$ 148 (12 %)                                 | $\text{Pd}_2 \text{d}\sigma \rightarrow \text{d}_{x^2-y^2}$      |

## Excited-state lifetimes of d<sup>7</sup>-d<sup>7</sup> binuclear complexes and spin-orbit coupling (SOC) calculations

**Table S5** Excited-state lifetimes of metal-metal bonded d<sup>7</sup>-d<sup>7</sup> binuclear complexes in literature.<sup>17</sup>

| Species                                                                                                 | Excited-state lifetime         |
|---------------------------------------------------------------------------------------------------------|--------------------------------|
| $[\text{Pt}^{\text{III}}(\mu\text{-pyrophosphite})_2\text{X}]_2$ <sup>17a</sup>                         | 22 μs (X = Cl, 77 K)           |
|                                                                                                         | 15 μs (X = Br, 77 K)           |
|                                                                                                         | 18 μs (X = SCN, 77 K)          |
|                                                                                                         | 23 μs (X = py, 77 K)           |
| $[\text{Re}^0(\text{bis}(\text{dimethylphosphino})\text{methane})(\text{CO})_3]_2$ <sup>17b</sup>       | 31 μs (77 K)                   |
| $[\text{Rh}^{\text{II}}(\mu\text{-acetate})_2(\text{L})]_2$ <sup>17c</sup>                              | 4.4 μs (L = MeOH)              |
|                                                                                                         | 5.0 μs (L = PPh <sub>3</sub> ) |
|                                                                                                         | 3.5 μs (L = THF)               |
|                                                                                                         | 4.8 μs (L = py)                |
| $[\text{Pt}^{\text{III}}(\mu\text{-C}_6\text{H}_3\text{-5-Me-2-AsPh}_2)_2(\text{CN})]_2$ <sup>17d</sup> | 30 μs (77 K)                   |

**Table S6** TDDFT-calculated spin-orbit coupling (SOC) between the singlet and triplet excited states of the  $(d\sigma)^1(d\sigma^*)^1$  configuration of **1** and benchmark systems,  $[\text{Pt}^{\text{III}}(\mu\text{-pyrophosphite; pop})_2\text{Cl}]_2$  and  $[\text{Re}^0(\text{bis}(\text{dimethylphosphino})\text{methane; dmpm})(\text{CO})_3]_2$ , which are known to undergo ISC to the triplet state.<sup>17a, 17b</sup>

| Species                                                             | Excited state                         | TDDFT assignment                                                | Molecular orbitals (MO)                                                                     | DFT-calculated SOC constants |
|---------------------------------------------------------------------|---------------------------------------|-----------------------------------------------------------------|---------------------------------------------------------------------------------------------|------------------------------|
| $[\text{Pd}^{\text{III}}(\text{phpy})(\text{OAcCl})_2$ ( <b>1</b> ) | Singlet<br>$(d\sigma)^1(d\sigma^*)^1$ | MO #174 $\rightarrow$ #175 (64 %)<br>(12,396 $\text{cm}^{-1}$ ) | 175<br>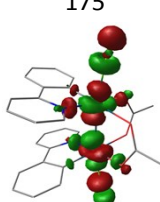   | 22.2                         |
|                                                                     | Triplet<br>$(d\sigma)^1(d\sigma^*)^1$ | MO #174 $\rightarrow$ #175 (59 %)<br>(4,807 $\text{cm}^{-1}$ )  | 174<br>   |                              |
| $[\text{Pt}^{\text{III}}(\text{pop})_2\text{Cl}]_2$                 | Singlet<br>$(d\sigma)^1(d\sigma^*)^1$ | MO #236 $\rightarrow$ #241 (69 %)<br>(30,916 $\text{cm}^{-1}$ ) | 241<br> | 23.1                         |
|                                                                     | Triplet<br>$(d\sigma)^1(d\sigma^*)^1$ | MO #236 $\rightarrow$ #241 (97 %)<br>(17,734 $\text{cm}^{-1}$ ) | 236<br> |                              |

Table S6. Continued.

| Species                                                 | Excited state                                   | TDDFT assignment                                    | Molecular orbitals (MO)                                                                   | DFT-calculated SOC constants |
|---------------------------------------------------------|-------------------------------------------------|-----------------------------------------------------|-------------------------------------------------------------------------------------------|------------------------------|
| [Re <sup>0</sup> (dmpm)(CO) <sub>3</sub> ] <sub>2</sub> | Singlet<br>(dσ) <sup>1</sup> (dσ*) <sup>1</sup> | MO #190 → #193 (48 %)<br>(30,064 cm <sup>-1</sup> ) | 193<br>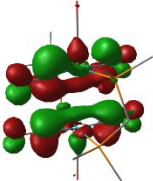 | 845                          |
|                                                         | Triplet<br>(dσ) <sup>1</sup> (dσ*) <sup>1</sup> | MO #190 → #193 (71 %)<br>(23,404 cm <sup>-1</sup> ) | 190<br> |                              |

## Comparison of internal charge transfer energies

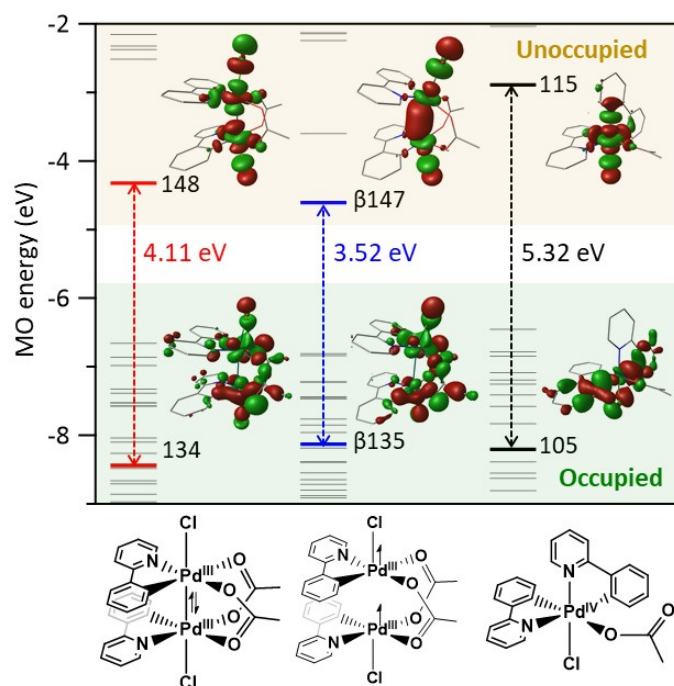

**Fig. S16** The comparison of DFT-calculated MO energy plot showing internal charge transfer (ICT) energies relevant to RE reactions of **1**(S<sub>0</sub>) (left), **1**(T<sub>1</sub>) (middle), and (phpy)<sub>2</sub>Pd<sup>IV</sup>(OAc)Cl (right).

### DFT-calculated RE reactions of **1** at the ground and triplet excited states

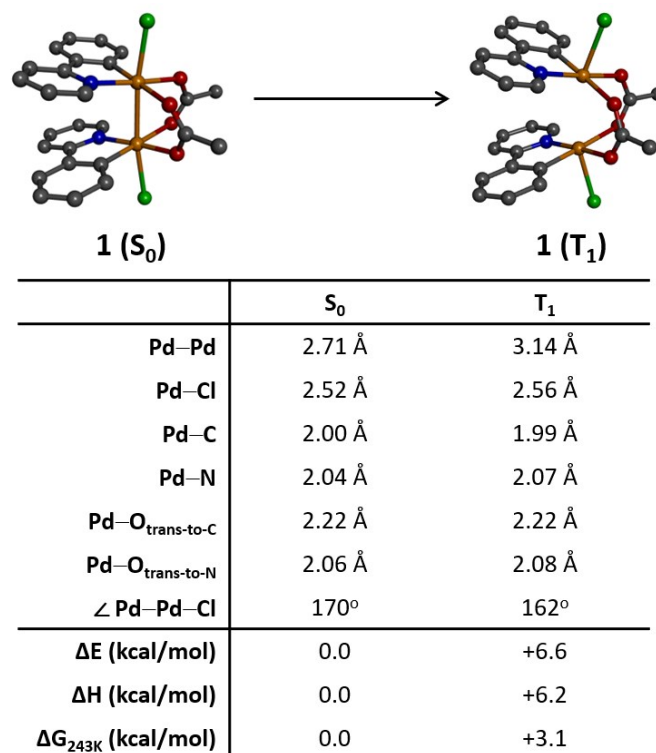

**Fig. S17** DFT-calculated relative energies and geometries of **1** at the ground state (S<sub>0</sub>) and the triplet excited state (T<sub>1</sub>).



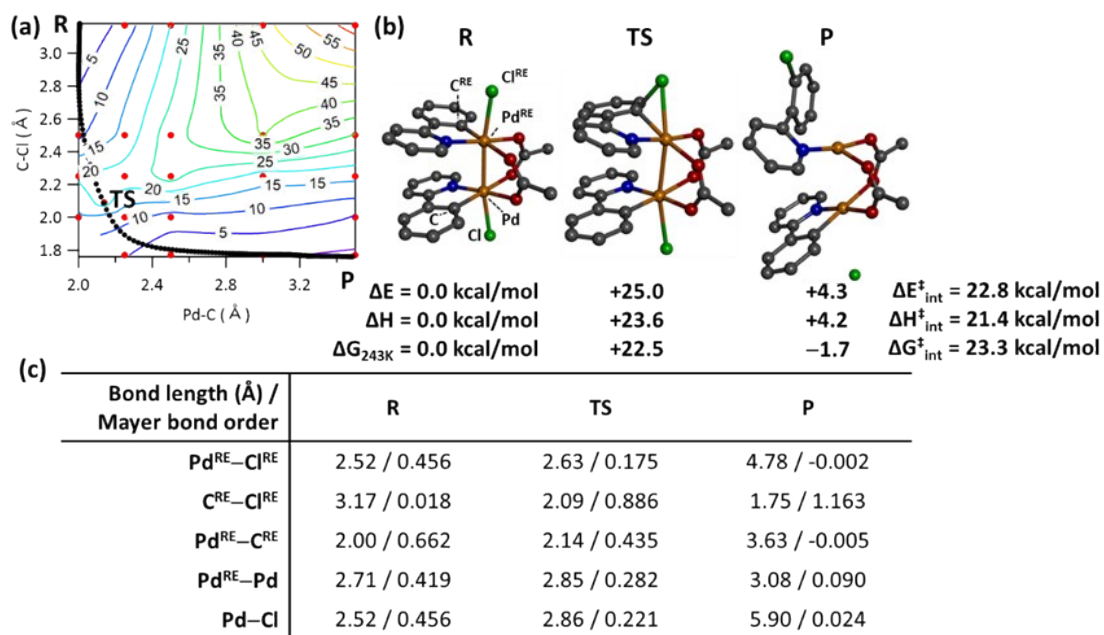

**Fig. S18** (a) Potential energy surface for the C–Cl bond-forming RE reaction of **1** at the ground state ( $S_0$ ). (b) Energy and (c) bond length changes from reactant (R) to the transition state (TS) and product (P).

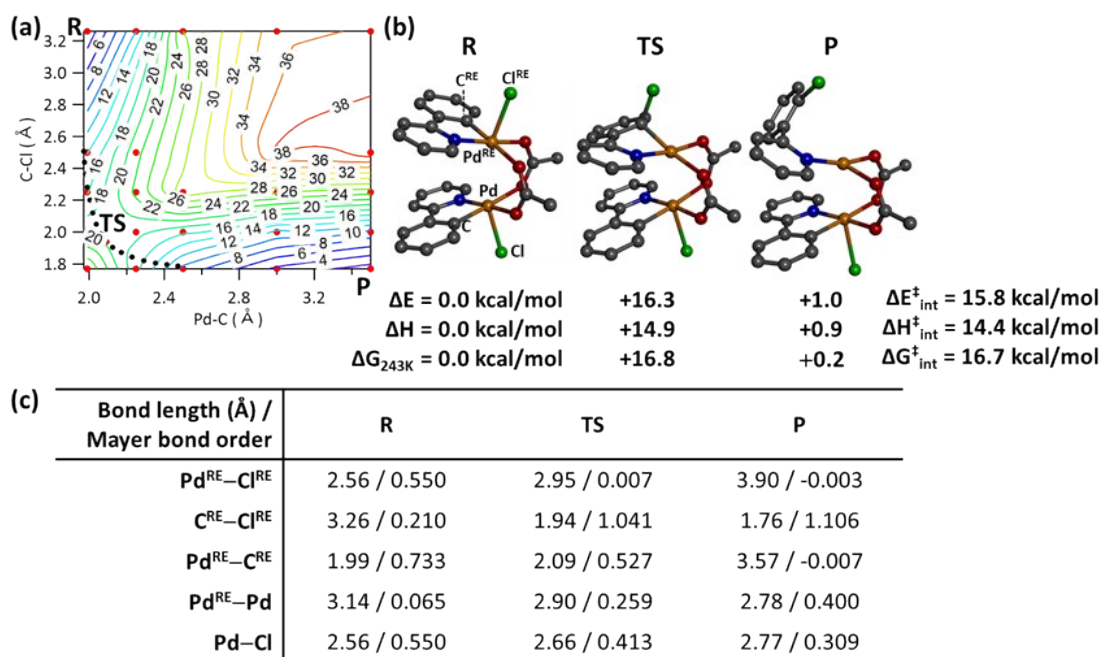

**Fig. S19** (a) Potential energy surface for the C–Cl bond-forming RE reaction of **1** at the  $T_1$  state. (b) Energy and (c) geometry changes from reactant (R) to the transition state (TS) and product (P).

**Table S7** Experimental and DFT-calculated  $\Delta G_{243K}^\ddagger$ 's for the RE reaction of **1** at the  $S_0$  state, obtained with various functionals.

|                                       | <b>Experimental</b> | <b>B3LYP</b> | <b>BP86</b> | <b>Cam-B3LYP</b> |
|---------------------------------------|---------------------|--------------|-------------|------------------|
| $\Delta G_{243K}^\ddagger$ (kcal/mol) | 20.7                | 22.5         | 24.2        | 22.4             |

## <sup>1</sup>H-NMR spectra of Pd complexes

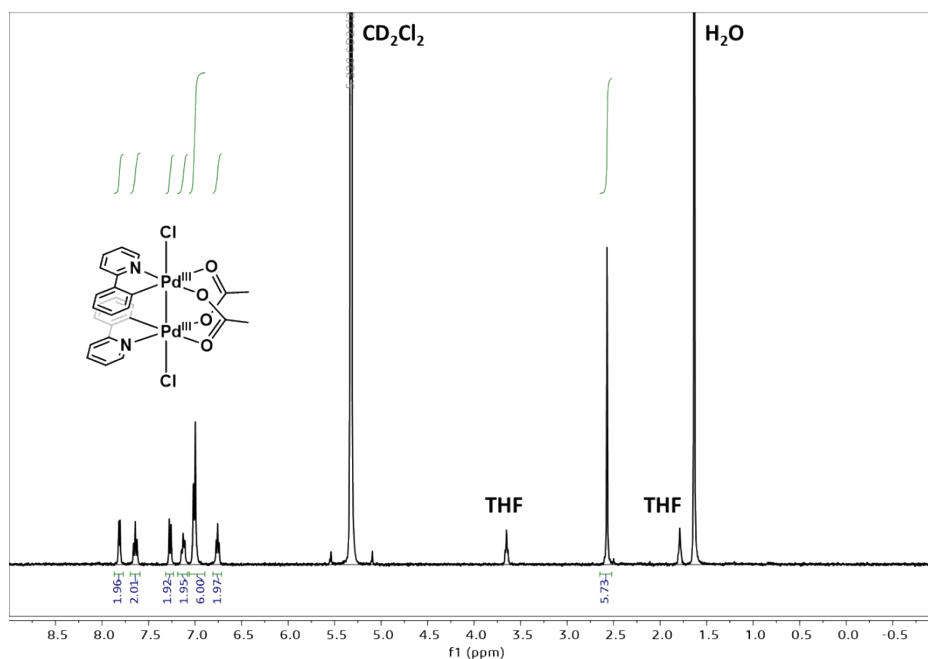

**Fig. S20** <sup>1</sup>H-NMR spectrum of [(phpy)Pd<sup>III</sup>(OAc)Cl]<sub>2</sub> in CD<sub>2</sub>Cl<sub>2</sub>. <sup>1</sup>H NMR (400 MHz, CD<sub>2</sub>Cl<sub>2</sub>, -30 °C): δ = 7.81 (d, *J* = 5.7 Hz, 2H, phpy), 7.64 (t, *J* = 7.8 Hz, 2H, phpy), 7.27 (d, *J* = 7.5 Hz, 2H, phpy), 7.15-7.09 (m, 2H), 7.04-6.98 (m, 6H, phpy), 6.76 (t, *J* = 6.4 Hz, 2H, phpy), 2.57 ppm (s, 6H, OAc).

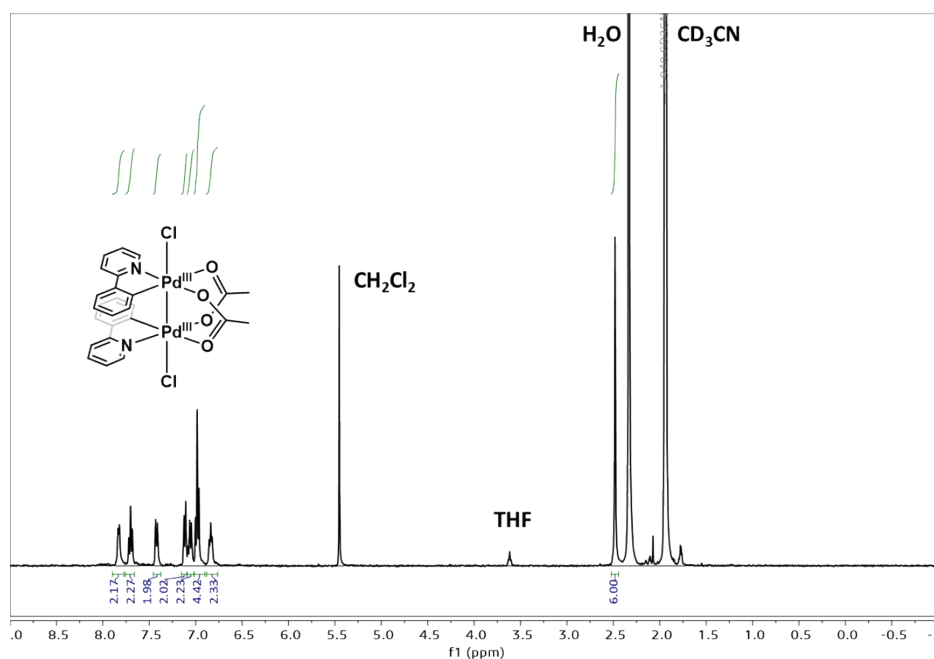

**Fig. S21** <sup>1</sup>H-NMR spectrum of [(phpy)Pd<sup>III</sup>(OAc)Cl]<sub>2</sub> in CD<sub>3</sub>CN. <sup>1</sup>H NMR (400 MHz, CD<sub>3</sub>CN, -30 °C): δ = 7.83 (d, *J* = 5.9 Hz, 2H, phpy), 7.70 (t, *J* = 7.7 Hz, 2H, phpy), 7.42 (d, *J* = 8.0 Hz, 2H, phpy), 7.12 (d, *J* = 7.5 Hz, 2H, phpy), 7.09-7.03 (m, 2H, phpy), 6.98 (t, *J* = 7.6 Hz, 4H, phpy), 6.84 (t, *J* = 7.4 Hz, 2H, phpy), 2.48 ppm (s, 6H, OAc).

## Simulation for the dark reaction of **1**

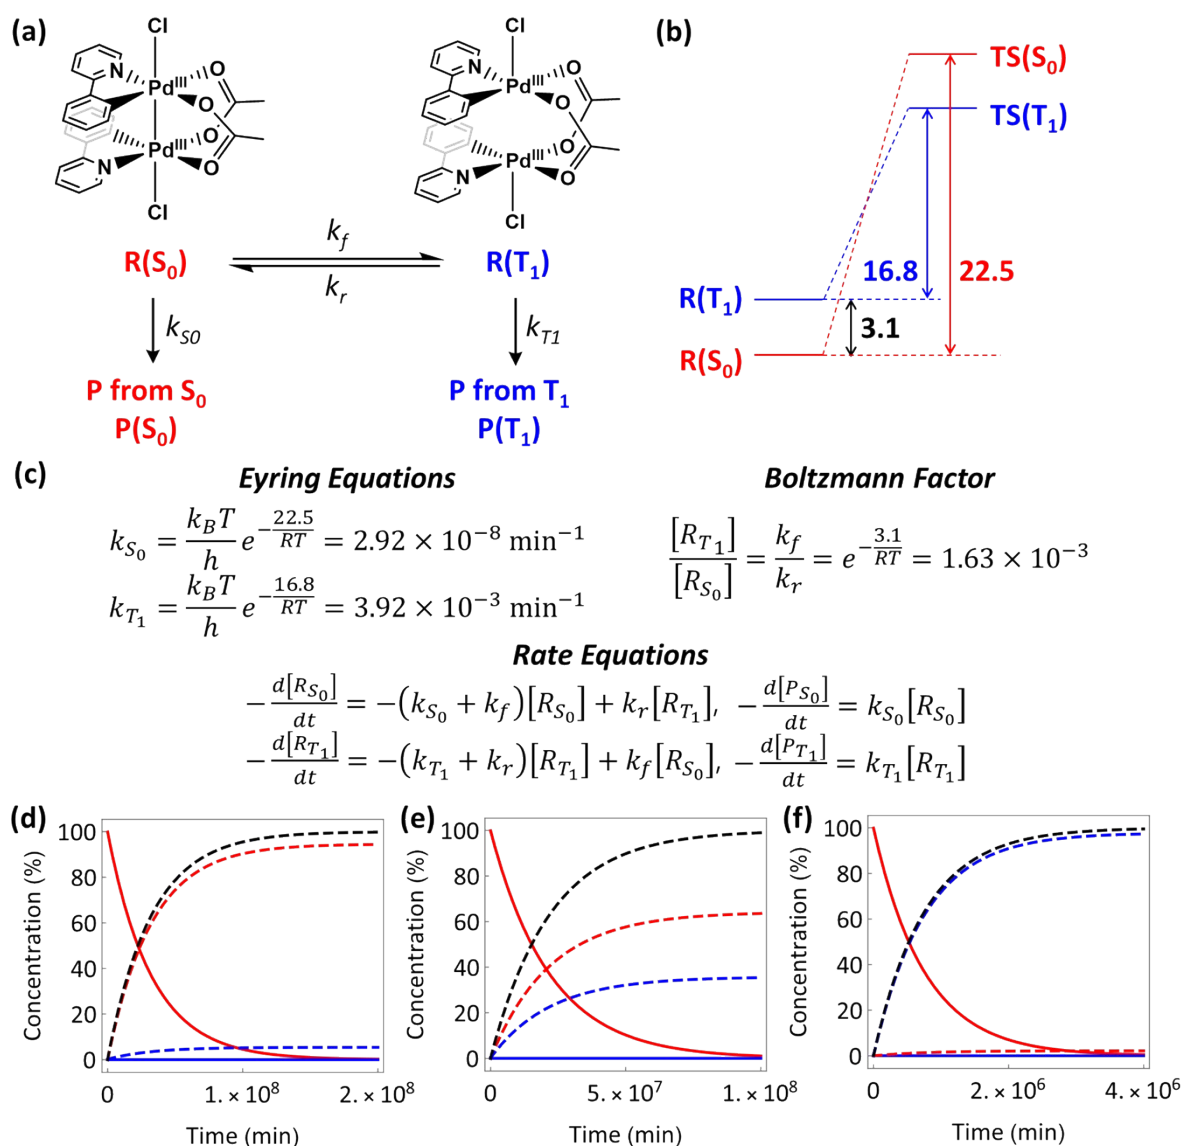

**Fig. S22** Simulation for the dark reaction kinetics involving two electronic states,  $S_0$  and  $T_1$ . (a) RE reaction scheme of **1** from  $S_0$  and  $T_1$  states with RE rate constants ( $k_{S_0}$  and  $k_{T_1}$ ) and interconversion rate constants ( $k_f$  and  $k_r$ ). (b) DFT-calculated  $\Delta G$  values in kcal/mol. (c) Equations used for simulation of (d)~(f), including Eyring equations for determining  $k_{S_0}$  and  $k_{T_1}$  values, Boltzmann factor for determining the population ratio of the reactants in the  $S_0$  vs.  $T_1$  state ( $R(S_0)$  and  $R(T_1)$ ), and rate equations of reactions in scheme (a). (d)~(f) Simulated concentration changes of  $R(S_0)$  (red solid),  $R(T_1)$  (blue solid), the product from the  $S_0$  pathway ( $P(S_0)$ , red dashed), the product from the  $T_1$  pathway ( $P(T_1)$ , blue dashed), and  $P(S_0)+P(T_1)$  (black solid) when (d) the spin crossover is slower than the  $S_0$  RE reaction with  $k_f = 1.63 \times 10^{-9} \text{ min}^{-1}$  and  $k_r = 1.00 \times 10^{-6} \text{ min}^{-1}$ , (e) the rate of spin crossover is comparable to that of the  $S_0$  RE reaction with  $k_f = 1.63 \times 10^{-8} \text{ min}^{-1}$  and  $k_r = 1.00 \times 10^{-5} \text{ min}^{-1}$ , and (f) the spin crossover is faster than the  $S_0$  RE reaction with  $k_f = 1.63 \times 10^{-6} \text{ min}^{-1}$  and  $k_r = 1.00 \times 10^{-3} \text{ min}^{-1}$  as a function of reaction time at 243 K.

## Correlations between the ICT energy costs and C-C bond-forming RE reaction coordinate of Pt<sup>IV</sup> complexes

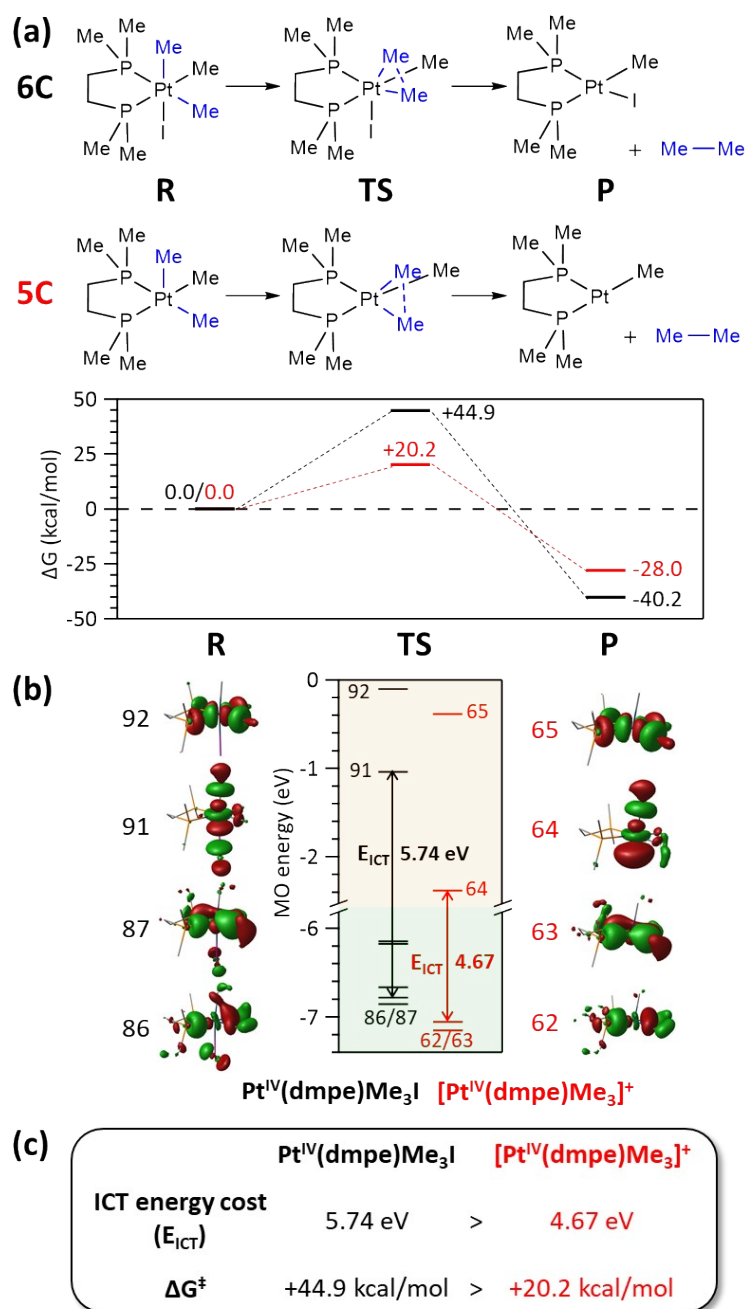

**Fig. S23** (a) DFT-calculated RE reaction coordinate of 6C Pt<sup>IV</sup>(1,2-bis(dimethylphosphino)ethane; dmpe)Me<sub>3</sub>I (top) and 5C [Pt<sup>IV</sup>(dmpe)Me<sub>3</sub>]<sup>+</sup> (bottom) complexes. (b) FMOs and ICT energy costs of the RE reactions. (c) A comparison between the ICT energy costs and RE barriers of the 6C vs. 5C Pt<sup>IV</sup> complexes.

## Cartesian Coordinates of DFT-optimized Pd complexes

### [(phpy)Pd<sup>III</sup>(OAc)Cl]<sub>2</sub> (1), S<sub>0</sub>

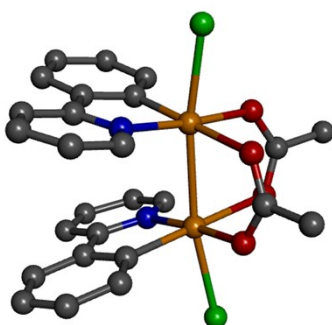

|    |          |          |          |    |          |          |          |
|----|----------|----------|----------|----|----------|----------|----------|
| Pd | 1.064645 | 1.269395 | 0.469346 | C  | -1.69526 | -1.99571 | -0.1859  |
| N  | -0.37899 | 1.024385 | 1.894874 | C  | -1.62125 | -1.44322 | -1.53629 |
| C  | -0.12522 | 0.577127 | 3.13209  | O  | 2.452357 | -1.67388 | 1.003225 |
| C  | -1.12512 | 0.492248 | 4.086994 | O  | 2.715564 | 0.445999 | 1.702368 |
| C  | -2.41609 | 0.883435 | 3.738006 | C  | 3.027749 | -0.7688  | 1.699025 |
| C  | -2.66439 | 1.365117 | 2.460345 | C  | 4.177658 | -1.23205 | 2.56072  |
| C  | -2.85268 | 2.528029 | -0.39898 | Cl | 1.493656 | -3.56739 | -1.41092 |
| C  | -2.79112 | 3.103266 | -1.66319 | H  | 0.896692 | 0.294492 | 3.339205 |
| C  | -1.57808 | 3.159335 | -2.35037 | H  | -0.8893  | 0.123122 | 5.075679 |
| C  | -0.41397 | 2.627697 | -1.7858  | H  | -3.22136 | 0.822093 | 4.459532 |
| C  | -0.48888 | 2.041667 | -0.53429 | H  | -3.68729 | 3.51641  | -2.10992 |
| C  | -1.69505 | 1.99587  | 0.185921 | H  | -1.53055 | 3.618504 | -3.3313  |
| C  | -1.62107 | 1.44342  | 1.536326 | H  | 0.526549 | 2.678473 | -2.3178  |
| O  | 2.452487 | 1.673648 | -1.00327 | H  | 5.100828 | 1.131509 | -1.98295 |
| O  | 2.715471 | -0.44625 | -1.70243 | H  | 4.057818 | 2.278015 | -2.83744 |
| C  | 3.027753 | 0.768522 | -1.69911 | H  | 4.258357 | 0.605292 | -3.4483  |
| C  | 4.177605 | 1.231675 | -2.56093 | H  | 0.896591 | -0.29448 | -3.33918 |
| Cl | 1.494027 | 3.567231 | 1.410862 | H  | -0.88943 | -0.12284 | -5.0756  |
| Pd | 1.064507 | -1.26952 | -0.46936 | H  | -3.22155 | -0.82159 | -4.45943 |
| N  | -0.37913 | -1.02431 | -1.89485 | H  | -3.68761 | -3.51614 | 2.109913 |
| C  | -0.12535 | -0.57702 | -3.13206 | H  | -1.53085 | -3.61851 | 3.331248 |
| C  | -1.12526 | -0.49199 | -4.08693 | H  | 0.526322 | -2.67866 | 2.317734 |
| C  | -2.41627 | -0.88306 | -3.73793 | H  | 5.100767 | -1.13244 | 1.98246  |

|   |          |          |          |   |          |          |          |
|---|----------|----------|----------|---|----------|----------|----------|
| C | -2.66459 | -1.36477 | -2.46028 | H | 4.057565 | -2.27826 | 2.837615 |
| C | -2.85293 | -2.52777 | 0.399001 | H | 4.258862 | -0.6054  | 3.447856 |
| C | -2.7914  | -3.10307 | 1.663181 | H | -3.79585 | 2.503467 | 0.133775 |
| C | -1.57836 | -3.1593  | 2.350341 | H | -3.65647 | 1.690804 | 2.180259 |
| C | -0.4142  | -2.62776 | 1.785763 | H | -3.6567  | -1.69036 | -2.18018 |
| C | -0.48908 | -2.04166 | 0.534286 | H | -3.79612 | -2.50309 | -0.13373 |

**[(phpy)Pd<sup>III</sup>(OAc)Cl]<sub>2</sub> (1), T<sub>1</sub>**

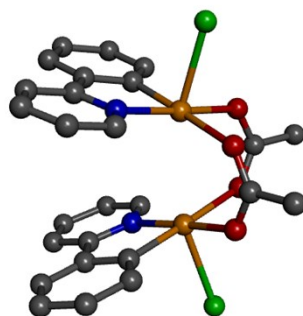

|    |          |          |          |    |          |          |          |
|----|----------|----------|----------|----|----------|----------|----------|
| Pd | 1.063416 | 1.479589 | 0.53003  | C  | -1.59384 | -2.49053 | -0.13627 |
| N  | -0.49959 | 1.322902 | 1.876965 | C  | -1.67151 | -1.87146 | -1.46034 |
| C  | -0.3943  | 0.746013 | 3.080912 | O  | 2.519881 | -1.72919 | 0.938842 |
| C  | -1.47623 | 0.672872 | 3.945524 | O  | 2.522333 | 0.369229 | 1.778835 |
| C  | -2.69218 | 1.216838 | 3.537944 | C  | 2.942308 | -0.81246 | 1.717257 |
| C  | -2.791   | 1.821643 | 2.291303 | C  | 4.074852 | -1.20416 | 2.643799 |
| C  | -2.66524 | 3.111315 | -0.51871 | Cl | 1.815714 | -3.66293 | -1.6371  |
| C  | -2.47505 | 3.697075 | -1.76642 | H  | 0.578834 | 0.348372 | 3.33494  |
| C  | -1.2168  | 3.673243 | -2.36768 | H  | -1.36028 | 0.199884 | 4.911111 |
| C  | -0.13576 | 3.057013 | -1.72888 | H  | -3.5568  | 1.174644 | 4.188813 |
| C  | -0.33278 | 2.460004 | -0.49283 | H  | -3.30716 | 4.17729  | -2.26706 |
| C  | -1.59364 | 2.49068  | 0.136288 | H  | -1.06922 | 4.136618 | -3.33674 |
| C  | -1.67132 | 1.871636 | 1.460362 | H  | 0.841442 | 3.04703  | -2.19295 |
| O  | 2.519989 | 1.72897  | -0.93895 | H  | 5.007464 | 0.80175  | -2.2382  |
| O  | 2.522289 | -0.36945 | -1.77894 | H  | 4.163215 | 2.285679 | -2.7239  |
| C  | 2.942343 | 0.812211 | -1.71737 | H  | 3.919932 | 0.759422 | -3.62742 |
| C  | 4.074888 | 1.203825 | -2.64395 | H  | 0.578733 | -0.34844 | -3.33501 |
| Cl | 1.816037 | 3.66276  | 1.636996 | H  | -1.36044 | -0.19972 | -4.91109 |
| Pd | 1.063308 | -1.4797  | -0.53011 | H  | -3.55704 | -1.17423 | -4.1887  |
| N  | -0.49973 | -1.32286 | -1.87699 | H  | -3.30743 | -4.17698 | 2.26713  |
| C  | -0.39443 | -0.74597 | -3.08094 | H  | -1.06945 | -4.13655 | 3.336715 |
| C  | -1.47639 | -0.6727  | -3.9455  | H  | 0.841281 | -3.04715 | 2.192861 |
| C  | -2.69239 | -1.21653 | -3.53787 | H  | 5.007461 | -0.80226 | 2.23795  |
| C  | -2.79122 | -1.82134 | -2.29123 | H  | 4.163026 | -2.28602 | 2.72384  |
| C  | -2.66547 | -3.11105 | 0.518764 | H  | 3.920026 | -0.75964 | 3.627238 |



|   |          |          |          |   |          |          |          |
|---|----------|----------|----------|---|----------|----------|----------|
| C | -2.4753  | -3.69685 | 1.76646  | H | -3.64523 | 3.141712 | -0.0573  |
| C | -1.21702 | -3.67315 | 2.36767  | H | -3.72645 | 2.255065 | 1.965319 |
| C | -0.13594 | -3.05703 | 1.728828 | H | -3.7267  | -2.25465 | -1.9652  |
| C | -0.33295 | -2.45999 | 0.492788 | H | -3.64549 | -3.14134 | 0.057389 |

(ppy)<sub>2</sub>Pd<sup>IV</sup>(OAc)Cl

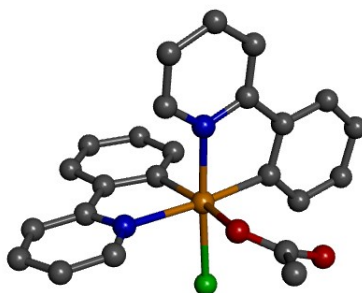

|    |          |          |          |    |          |          |          |
|----|----------|----------|----------|----|----------|----------|----------|
| Pd | 0.06132  | -0.16541 | -0.6628  | H  | -4.38187 | -2.939   | -1.46375 |
| N  | 0.790901 | -1.23856 | 0.942215 | C  | -4.71325 | -1.2594  | -0.13641 |
| N  | -2.02098 | -0.78911 | -0.44729 | H  | -5.77381 | -1.44095 | -0.01039 |
| C  | 0.057901 | -2.0979  | 1.664597 | C  | -4.11426 | -0.18385 | 0.50706  |
| H  | -0.9888  | -2.17734 | 1.411116 | H  | -4.70596 | 0.473449 | 1.128656 |
| C  | 0.616746 | -2.84707 | 2.686542 | C  | -2.74495 | 0.0422   | 0.336137 |
| H  | -0.00473 | -3.52913 | 3.250302 | C  | -1.97606 | 1.145683 | 0.936779 |
| C  | 1.975287 | -2.69574 | 2.957432 | C  | -2.54802 | 2.071943 | 1.822649 |
| H  | 2.444263 | -3.26772 | 3.748471 | H  | -3.59171 | 1.985115 | 2.099141 |
| C  | 2.726665 | -1.80596 | 2.204887 | C  | -1.78912 | 3.106086 | 2.356966 |
| H  | 3.78232  | -1.68019 | 2.400139 | H  | -2.24554 | 3.812583 | 3.039863 |
| C  | 2.117285 | -1.07005 | 1.1851   | C  | -0.44556 | 3.229507 | 2.011828 |
| C  | 2.773134 | -0.09989 | 0.313252 | H  | 0.152459 | 4.035091 | 2.422971 |
| C  | 4.123659 | 0.266383 | 0.425674 | C  | 0.144789 | 2.316029 | 1.133268 |
| H  | 4.752992 | -0.18776 | 1.181727 | H  | 1.188032 | 2.429996 | 0.87348  |
| C  | 4.6595   | 1.220481 | -0.42868 | C  | -0.61225 | 1.281869 | 0.600671 |
| H  | 5.701316 | 1.503216 | -0.33709 | O  | 0.368795 | -1.95388 | -1.83118 |
| C  | 3.851956 | 1.817502 | -1.39808 | C  | 1.188417 | -2.20686 | -2.80386 |
| H  | 4.267199 | 2.566944 | -2.06292 | O  | 2.054982 | -1.45874 | -3.25017 |
| C  | 2.508352 | 1.458678 | -1.52603 | C  | 0.981077 | -3.5996  | -3.40508 |
| H  | 1.894354 | 1.924101 | -2.28414 | H  | -0.00371 | -3.65086 | -3.8774  |
| C  | 1.973954 | 0.50025  | -0.67732 | H  | 1.748514 | -3.8108  | -4.14926 |
| C  | -2.59201 | -1.82143 | -1.07698 | H  | 1.006703 | -4.35934 | -2.6208  |
| H  | -1.92265 | -2.41643 | -1.68663 | Cl | -0.66204 | 1.154619 | -2.50322 |
| C  | -3.94586 | -2.09561 | -0.94515 |    |          |          |          |

## References

1. X. F. Zhao and C. Zhang, *Synthesis*, 2007, 551-557.
2. D. C. Powers and T. Ritter, *Nat. Chem.*, 2009, **1**, 302-309.
3. C. G. Hatchard and C. A. Parker, *Proc. R. Soc. London Ser. A*, 1956, **235**, 518-536.
4. J. N. Demas, W. D. Bowman, E. F. Zalewski and R. A. Velapoldi, *J. Phys. Chem.*, 1981, **85**, 2766-2771.
5. M. J. Frisch, G. W. Trucks, H. B. Schlegel, G. E. Scuseria, M. A. Robb, J. R. Cheeseman, G. Scalmani, V. Barone, G. A. Petersson, H. Nakatsuji, X. Li, M. Caricato, A. V. Marenich, J. Bloino, B. G. Janesko, R. Gomperts, B. Mennucci, H. P. Hratchian, J. V. Ortiz, A. F. Izmaylov, J. L. Sonnenberg, Williams, F. Ding, F. Lipparini, F. Egidi, J. Goings, B. Peng, A. Petrone, T. Henderson, D. Ranasinghe, V. G. Zakrzewski, J. Gao, N. Rega, G. Zheng, W. Liang, M. Hada, M. Ehara, K. Toyota, R. Fukuda, J. Hasegawa, M. Ishida, T. Nakajima, Y. Honda, O. Kitao, H. Nakai, T. Vreven, K. Throssell, J. A. Montgomery Jr., J. E. Peralta, F. Ogliaro, M. J. Bearpark, J. J. Heyd, E. N. Brothers, K. N. Kudin, V. N. Staroverov, T. A. Keith, R. Kobayashi, J. Normand, K. Raghavachari, A. P. Rendell, J. C. Burant, S. S. Iyengar, J. Tomasi, M. Cossi, J. M. Millam, M. Klene, C. Adamo, R. Cammi, J. W. Ochterski, R. L. Martin, K. Morokuma, O. Farkas, J. B. Foresman and D. J. Fox, *Gaussian 09*, 2013.
6. (a) A. D. Becke, *Phys. Rev. A*, 1988, **38**, 3098-3100; (b) C. T. Lee, W. T. Yang and R. G. Parr, *Phys. Rev. B*, 1988, **37**, 785-789.
7. (a) R. Krishnan, J. S. Binkley, R. Seeger and J. A. Pople, *J. Chem. Phys.*, 1980, **72**, 650-654; (b) A. D. McLean and G. S. Chandler, *J. Chem. Phys.*, 1980, **72**, 5639-5648; (c) M. M. Francl, W. J. Pietro, W. J. Hehre, J. S. Binkley, M. S. Gordon, D. J. Defrees and J. A. Pople, *J. Chem. Phys.*, 1982, **77**, 3654-3665.
8. (a) P. J. Hay and W. R. Wadt, *J. Chem. Phys.*, 1985, **82**, 299-310; (b) A. W. Ehlers, M. Bohme, S. Dapprich, A. Gobbi, A. Hollwarth, V. Jonas, K. F. Kohler, R. Stegmann, A. Veldkamp and G. Frenking, *Chem. Phys. Lett.*, 1993, **208**, 111-114; (c) L. E. Roy, P. J. Hay and R. L. Martin, *J. Chem. Theory Comput.*, 2008, **4**, 1029-1031.
9. B. P. Pritchard, D. Altarawy, B. Didier, T. D. Gibson and T. L. Windus, *J. Chem Inf. Model.*, 2019, **59**, 4814-4820.
10. V. Barone and M. Cossi, *J. Phys. Chem. A*, 1998, **102**, 1995-2001.
11. A. L. Tenderholt, *QMForge 2.4*, 2018.
12. F. Neese, *Wiley Interdiscip. Rev. Comput. Mol. Sci.*, 2018, **8**, 6.
13. F. Weigend and R. Ahlrichs, *Phys. Chem. Chem. Phys.*, 2005, **7**, 3297-3305.
14. (a) D. A. Pantazis, X.-Y. Chen, C. R. Landis and F. Neese, *J. Chem. Theory Comput.*, 2008, **4**, 908-919; (b) J. D. N. F. Rolfes, *J. Comput. Chem.*, 2020, **41**, 1842-1849.
15. J. P. Perdew, *Phys. Rev. B*, 1986, **33**, 8822-8824.
16. T. Yanai, D. P. Tew and N. C. Handy, *Chem. Phys. Lett.*, 2004, **393**, 51-57.
17. (a) A. E. Stigman, V. M. Miskowski and H. B. Gray, *J. Am. Chem. Soc.*, 1986, **108**, 2781-2782; (b) A. E. Stigman and V. M. Miskowski, *J. Am. Chem. Soc.*, 1988, **110**, 4053-4054; (c) P. M. Bradley, B. E. Bursten and C. Turro, *Inorg. Chem.*, 2001, **40**, 1376-1379; (d) M. A. Bennett, S. K. Bhargava, E. C.-C. Cheng, W. H. Lam, T. K.-M. Lee, S. H. Priver, J. Wagler, A. C. Willis and V. W.-W. Yam, *J. Am. Chem. Soc.*, 2010, **132**, 7094-7103.
